# Supplementary material for: Ruthenium-catalyzed cross-metathesis with electron-rich phenyl vinyl sulfide enables access to 2,3-dideoxy-d-ribopyranose ring system donors
Source: Royal Society of Chemistry journal article supplement (doi:10.1039/c4ra01668h), 2014-01-01
Supplement: c4ra01668h1.pdf [file c4ra01668h1.pdf]

## Ruthenium-Catalyzed Cross-Metathesis with Electron-Rich Phenyl Vinyl Sulfide Enables Access to 2,3-Dideoxy-D-ribofuranose Ring System Donors

Omar Boutureira,\* M. Isabel Matheu, Yolanda Díaz, and Sergio Castellón

*Departament de Química Analítica i Química Orgànica, Universitat Rovira i Virgili, C/ Marcel·lí  
Domingo s/n, 43007 Tarragona, Spain*

\*E-mail: omar.boutureira@urv.cat

### Table of Contents

|                             |    |
|-----------------------------|----|
| 1. NMR spectra of <b>3</b>  | S2 |
| 2. NMR spectra of <b>6</b>  | S3 |
| 3. NMR spectra of <b>9c</b> | S4 |
| 4. NMR spectra of <b>11</b> | S5 |

## 1. NMR spectra of 3

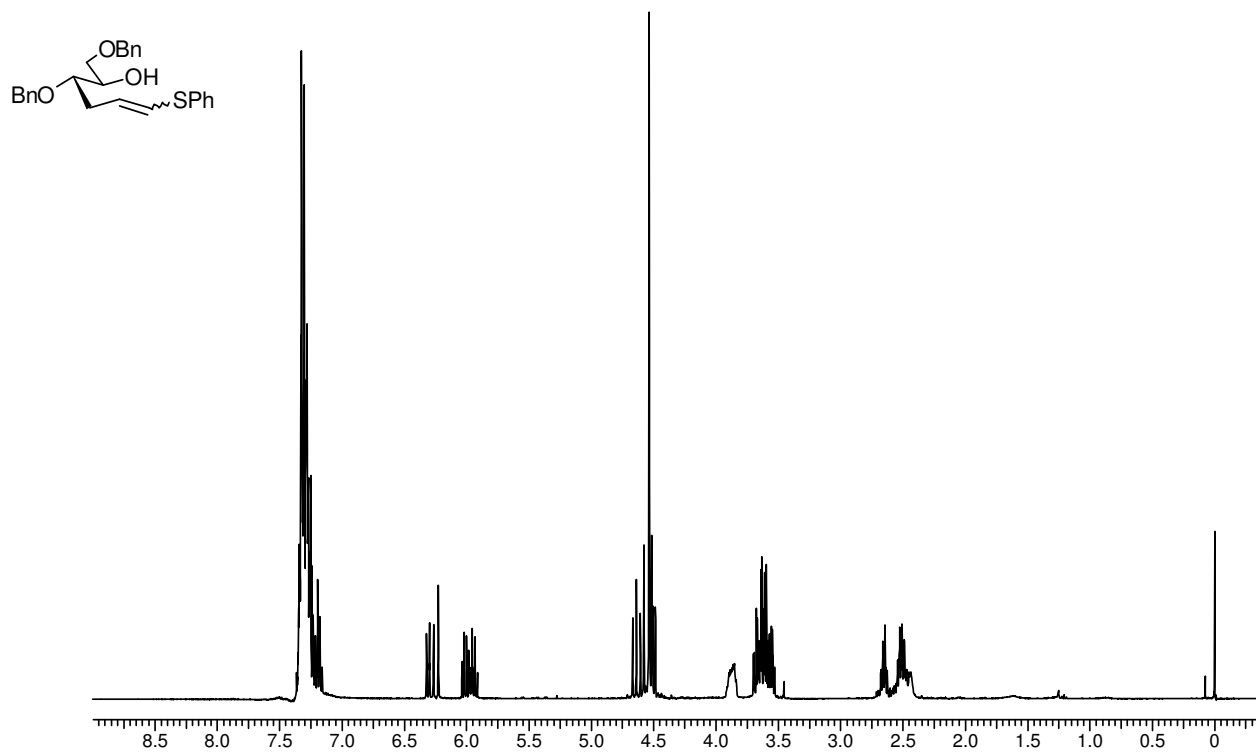

Figure S1. <sup>1</sup>H NMR (400 MHz, CDCl<sub>3</sub>) of 3.

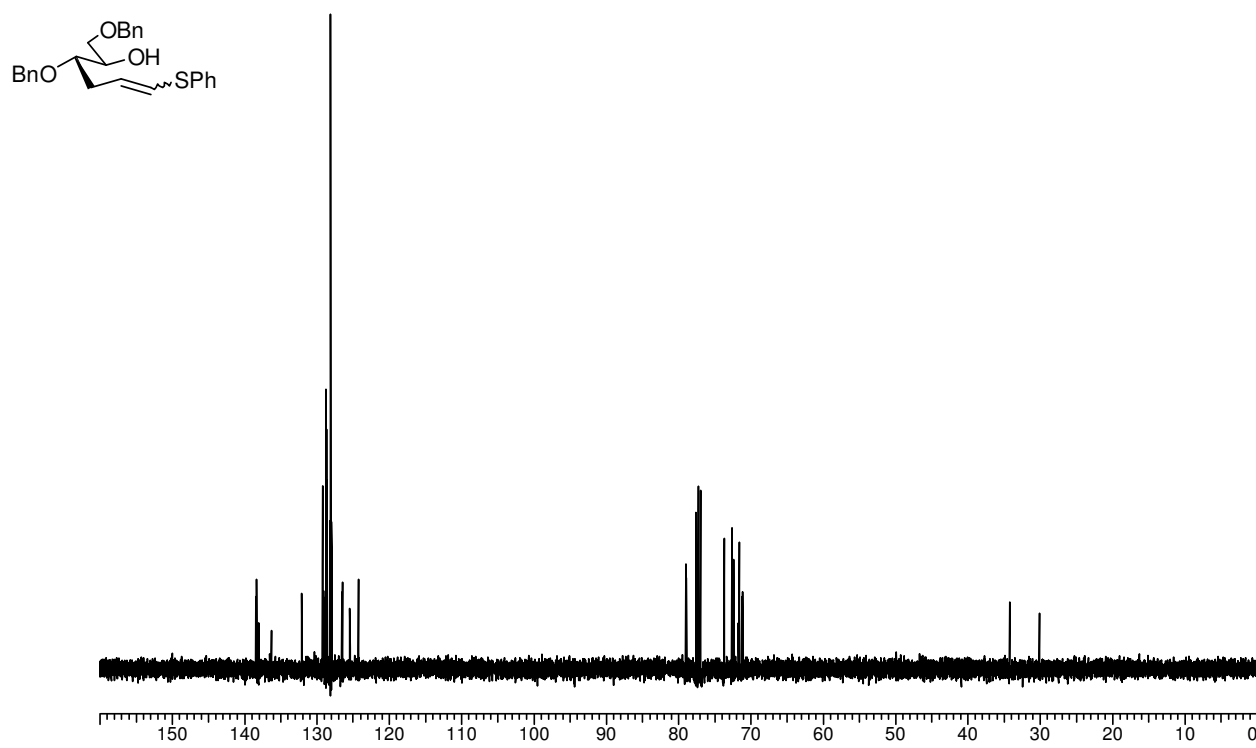

Figure S2. <sup>13</sup>C NMR (100.6 MHz, CDCl<sub>3</sub>) of 3.

## 2. NMR spectra 6

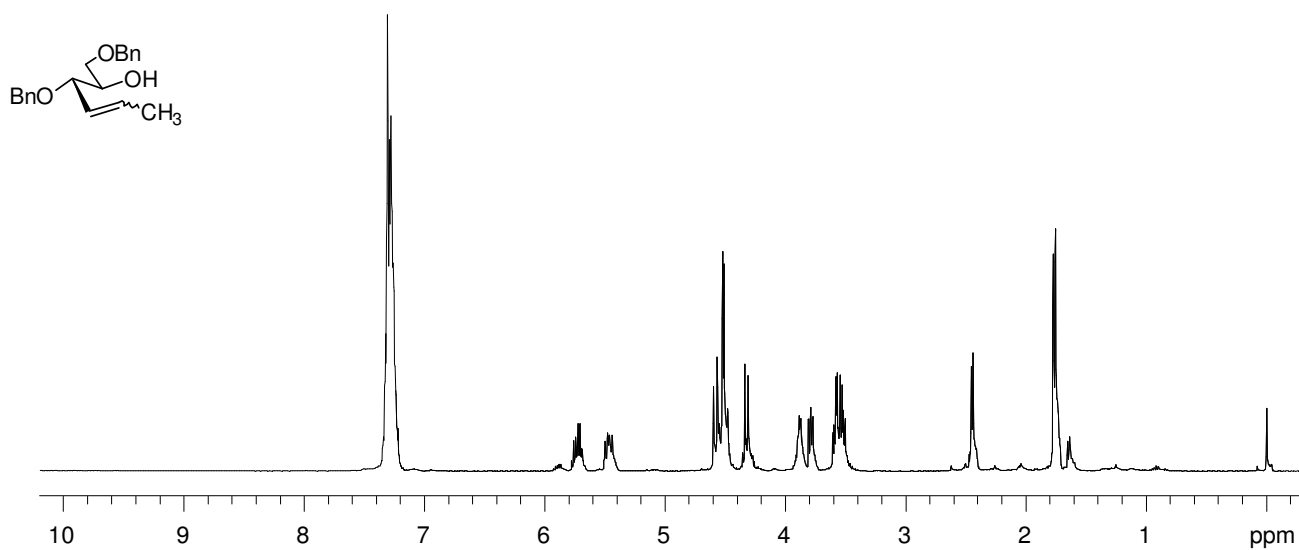

**Figure S3.** <sup>1</sup>H NMR (400 MHz, CDCl<sub>3</sub>) of **6**.

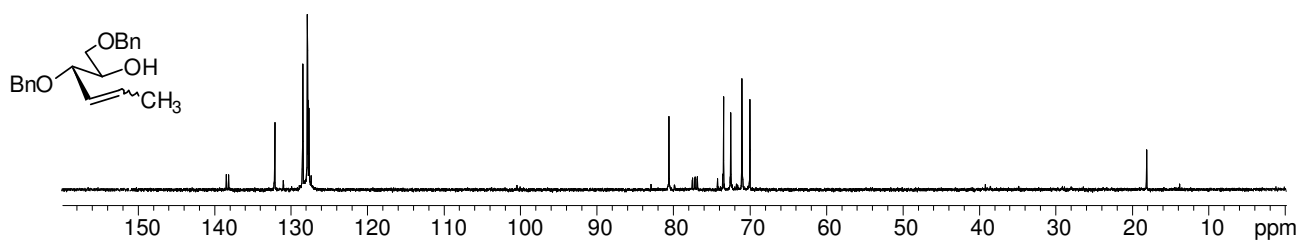

**Figure S4.** <sup>13</sup>C NMR (100.6 MHz, CDCl<sub>3</sub>) of **6**.

### 3. NMR spectra of 9c

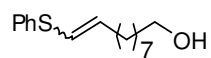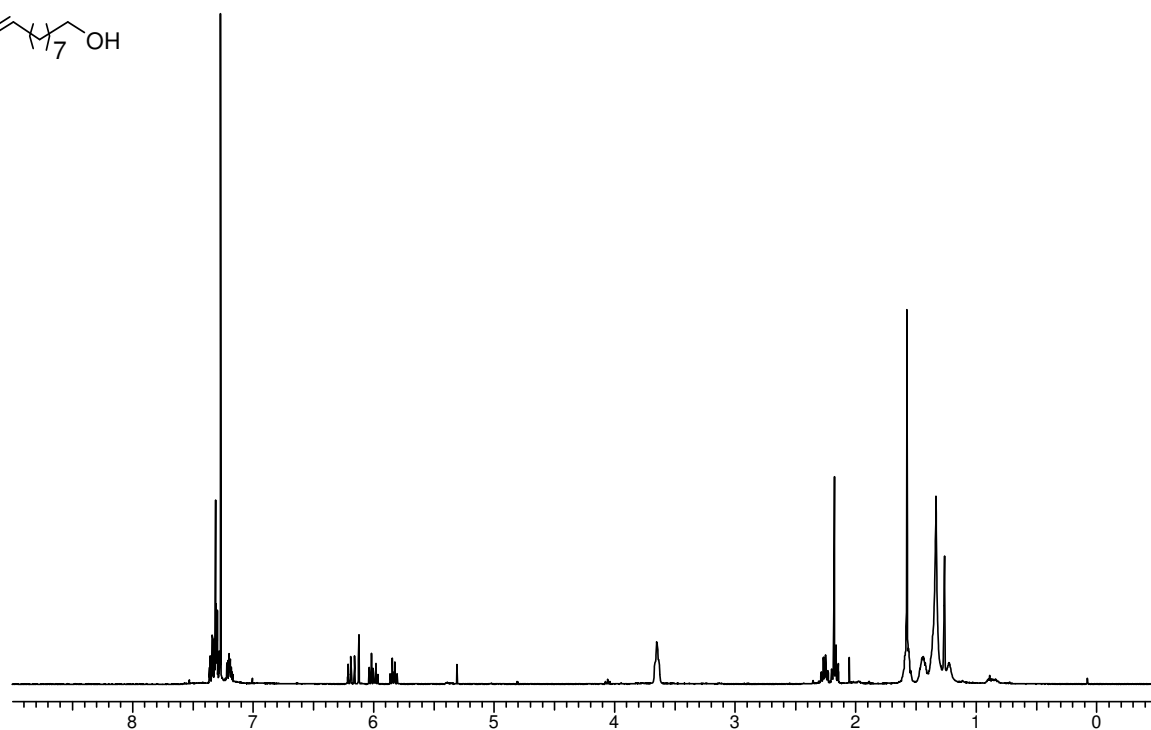

Figure S5. <sup>1</sup>H NMR (400 MHz, CDCl<sub>3</sub>) of 9c.

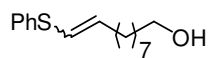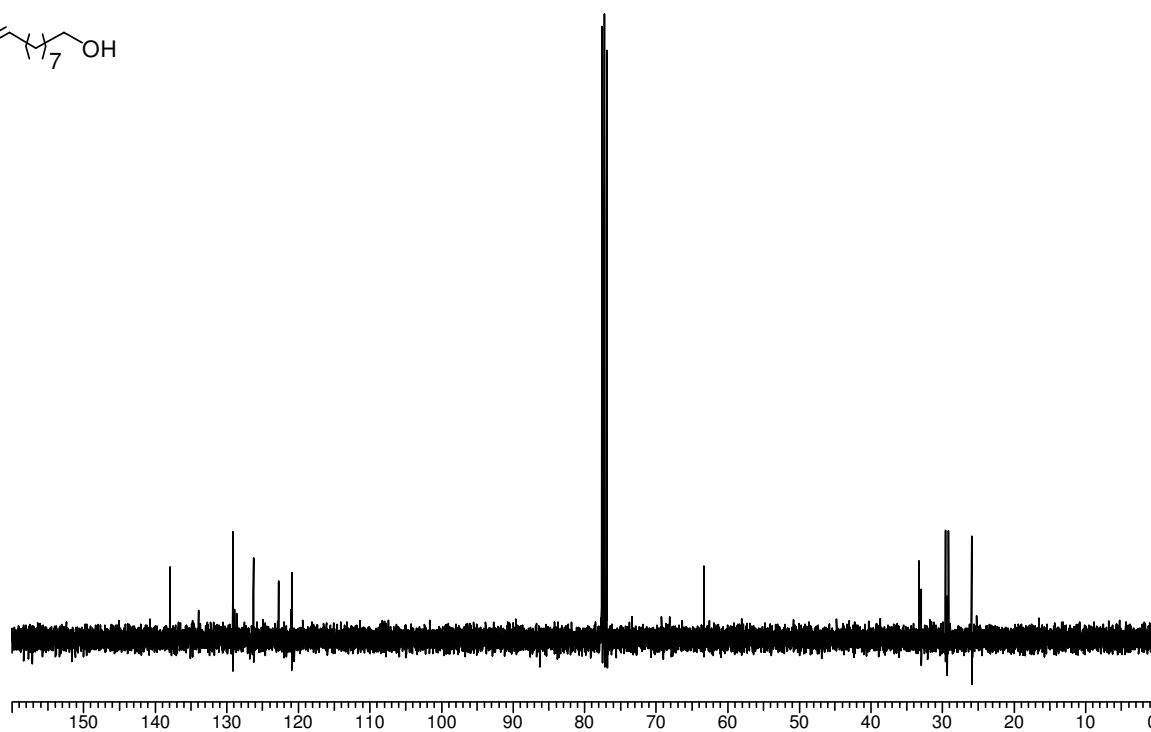

Figure S6. <sup>13</sup>C NMR (100.6 MHz, CDCl<sub>3</sub>) of 9c.

#### 4. NMR spectra of 11

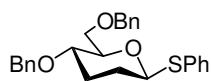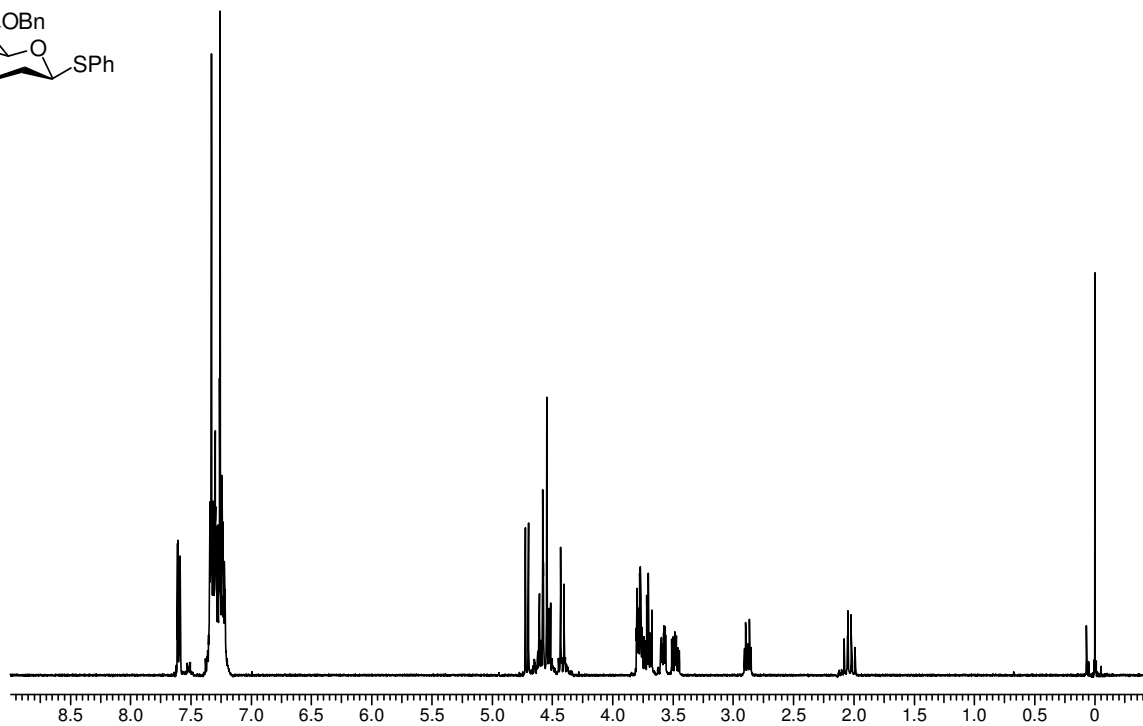

Figure S7. <sup>1</sup>H NMR (400 MHz, CDCl<sub>3</sub>) of 11.

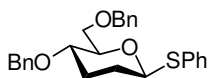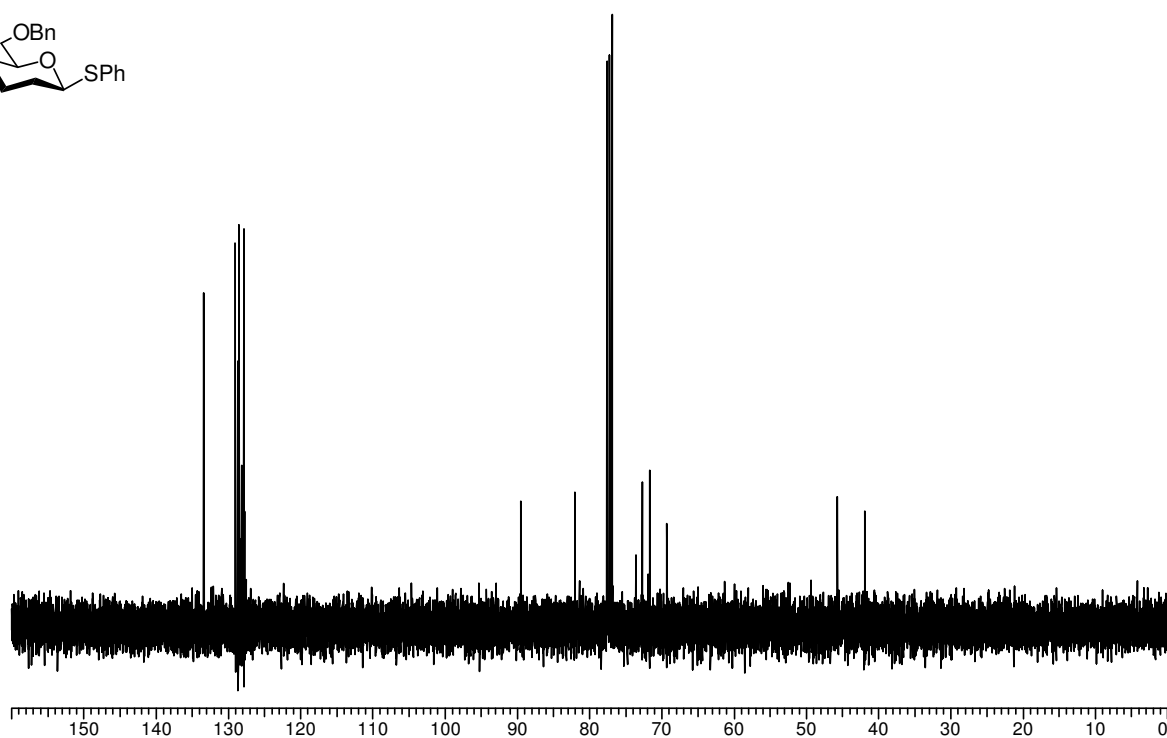

Figure S8. <sup>13</sup>C NMR (100.6 MHz, CDCl<sub>3</sub>) of 11.
